# Supplementary material
Source: MDPI journal article supplement (https://www.mdpi.com/2075-163X/13/10/1351)

# CISA-Particle Size Analysis Datas Reports

Test Date: 2022-10-11

|                   |                    |                           |
|-------------------|--------------------|---------------------------|
| Sample: 4-10MPa-1 | Size, mm: 0.25-0.5 | Number of particles: 396  |
|                   | Depth,m:           | Name: Volcaniclastic Rock |
|                   |                    |                           |

| No. | Particle Size |         | Thin Section Determination |             |                        | Correction |             |                        | Matrix Correction |                        |
|-----|---------------|---------|----------------------------|-------------|------------------------|------------|-------------|------------------------|-------------------|------------------------|
|     | D Value (mm)  | Φ Value | Number                     | Frequency % | Cumulative Frequency % | Number     | Frequency % | Cumulative Frequency % | Frequency %       | Cumulative Frequency % |
| 1   | ≥2.0000       | ≤-1.00  | 0                          | 0.00        | 0.00                   | 0          | 0.00        | 0.00                   | 0.00              | 0.00                   |
| 2   | ~ 1.6818      | ~ -0.75 | 0                          | 0.00        | 0.00                   | 0          | 0.00        | 0.00                   | 0.00              | 0.00                   |
| 3   | ~ 1.4142      | ~ -0.50 | 0                          | 0.00        | 0.00                   | 0          | 0.00        | 0.00                   | 0.00              | 0.00                   |
| 4   | ~ 1.1892      | ~ -0.25 | 0                          | 0.00        | 0.00                   | 0          | 0.00        | 0.00                   | 0.00              | 0.00                   |
| 5   | ~ 1.0000      | ~ -0.00 | 0                          | 0.00        | 0.00                   | 0          | 0.00        | 0.00                   | 0.00              | 0.00                   |
| 6   | ~ 0.8409      | ~ 0.25  | 0                          | 0.00        | 0.00                   | 0          | 0.00        | 0.00                   | 0.00              | 0.00                   |
| 7   | ~ 0.7071      | ~ 0.50  | 0                          | 0.00        | 0.00                   | 0          | 0.00        | 0.00                   | 0.00              | 0.00                   |
| 8   | ~ 0.5946      | ~ 0.75  | 0                          | 0.00        | 0.00                   | 0          | 0.00        | 0.00                   | 0.00              | 0.00                   |
| 9   | ~ 0.5000      | ~ 1.00  | 4                          | 13.81       | 13.81                  | 0          | 0.00        | 0.00                   | 0.00              | 0.00                   |
| 10  | ~ 0.4204      | ~ 1.25  | 4                          | 10.68       | 24.49                  | 3          | 10.78       | 10.78                  | 10.78             | 10.78                  |
| 11  | ~ 0.3536      | ~ 1.50  | 12                         | 21.13       | 45.63                  | 5          | 13.72       | 24.49                  | 13.72             | 24.49                  |
| 12  | ~ 0.2973      | ~ 1.75  | 9                          | 12.21       | 57.83                  | 12         | 21.13       | 45.63                  | 21.13             | 45.63                  |
| 13  | ~ 0.2500      | ~ 2.00  | 10                         | 8.98        | 66.82                  | 9          | 12.21       | 57.83                  | 12.21             | 57.83                  |
| 14  | ~ 0.2102      | ~ 2.25  | 12                         | 7.81        | 74.63                  | 14         | 11.87       | 69.71                  | 11.87             | 69.71                  |
| 15  | ~ 0.1768      | ~ 2.50  | 4                          | 1.89        | 76.51                  | 10         | 5.92        | 75.63                  | 5.92              | 75.63                  |
| 16  | ~ 0.1487      | ~ 2.75  | 11                         | 3.33        | 79.84                  | 4          | 1.58        | 77.21                  | 1.58              | 77.21                  |
| 17  | ~ 0.1250      | ~ 3.00  | 18                         | 4.16        | 84.00                  | 23         | 5.98        | 83.20                  | 5.98              | 83.20                  |
| 18  | ~ 0.1051      | ~ 3.25  | 16                         | 2.52        | 86.52                  | 13         | 2.34        | 85.54                  | 2.34              | 85.54                  |
| 19  | ~ 0.0884      | ~ 3.50  | 34                         | 3.82        | 90.34                  | 36         | 4.31        | 89.84                  | 4.31              | 89.84                  |
| 20  | ~ 0.0743      | ~ 3.75  | 36                         | 2.82        | 93.16                  | 38         | 3.11        | 92.95                  | 3.11              | 92.95                  |
| 21  | ~ 0.0625      | ~ 4.00  | 35                         | 1.96        | 95.12                  | 40         | 2.26        | 95.21                  | 2.26              | 95.21                  |
| 22  | ~ 0.0526      | ~ 4.25  | 42                         | 1.69        | 96.80                  | 51         | 1.95        | 97.16                  | 1.95              | 97.16                  |
| 23  | ~ 0.0442      | ~ 4.50  | 56                         | 1.60        | 98.40                  | 57         | 1.51        | 98.67                  | 1.51              | 98.67                  |
| 24  | ~ 0.0372      | ~ 4.75  | 48                         | 0.96        | 99.36                  | 53         | 0.96        | 99.63                  | 0.96              | 99.63                  |
| 25  | ~ 0.0313      | ~ 5.00  | 45                         | 0.64        | 100.00                 | 28         | 0.37        | 100.00                 | 0.37              | 100.00                 |
| 26  | ~ 0.0156      | ~ 6.00  | 0                          | 0.00        | 100.00                 | 0          | 0.00        | 100.00                 | 0.00              | 100.00                 |
| 27  | ~ 0.0078      | ~ 7.00  | 0                          | 0.00        | 100.00                 | 0          | 0.00        | 100.00                 | 0.00              | 100.00                 |
| 28  | ~ 0.0039      | ~ 8.00  | 0                          | 0.00        | 100.00                 | 0          | 0.00        | 100.00                 | 0.00              | 100.00                 |
| 29  | < 0.0039      | > 8.00  | Matrix Content             |             |                        | 0.00       |             |                        | 0.00              | 100.00                 |

|                        |               |                 |                                   |      |                  |                 |                 |      |             |      |
|------------------------|---------------|-----------------|-----------------------------------|------|------------------|-----------------|-----------------|------|-------------|------|
| $\Phi$                 | 1%            | 5%              | 10%                               | 16%  | 25%              | 50%             | 75%             | 84%  | 90%         | 95%  |
| Value                  | 1.02          | 1.12            | 1.23                              | 1.35 | 1.51             | 1.84            | 2.47            | 3.09 | 3.51        | 3.98 |
| Type<br>and<br>Content | $\Phi<-1$     |                 | $-1<\Phi<0$                       |      |                  | $0<\Phi<1$      |                 |      | $1<\Phi<2$  |      |
|                        | 0.00%         |                 | 0.00%                             |      |                  | 0.00%           |                 |      | 57.83%      |      |
|                        | $2<\Phi<3$    |                 | $3<\Phi<4$                        |      | $4<\Phi<5$       |                 | $5<\Phi<8$      |      | $\Phi\geq8$ |      |
|                        | 25.36%        |                 | 12.01%                            |      | 4.79%            |                 | 0.00%           |      | 0.00%       |      |
| Moment<br>Method       | Mean<br>$M_z$ | 2.12            | Standard<br>Deviation<br>$\sigma$ | 0.87 | Skewness<br>$SK$ | 1.13            | Kurtosis<br>$K$ | 3.46 |             |      |
| Graphic<br>Method      |               | 2.09            |                                   | 0.87 |                  | 0.46            |                 | 1.21 |             |      |
|                        |               | C Value: 0.4920 |                                   |      |                  | M Value: 0.2794 |                 |      |             |      |

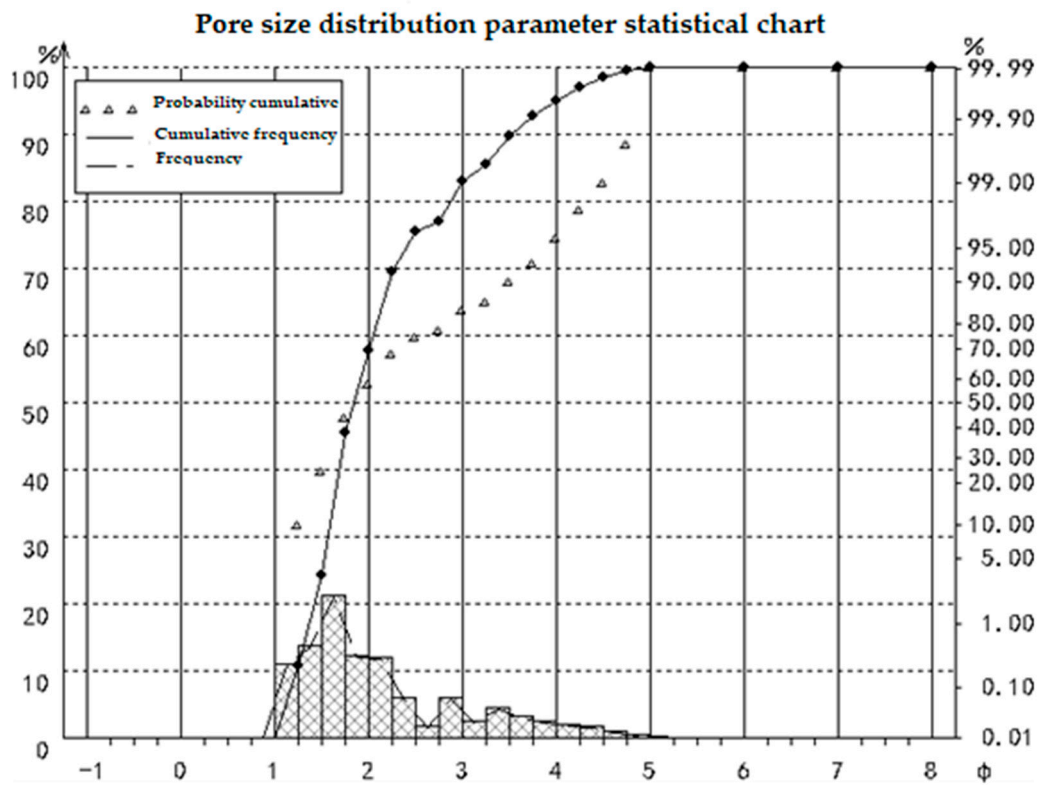

# CISA-Particle Size Analysis Datas Reports

Test Date: 2022-10-14

|                   |                    |                           |
|-------------------|--------------------|---------------------------|
| Sample: 4-10MPa-2 | Size, mm: 0.25-0.5 | Number of particles: 1205 |
|                   | Depth,m:           | Name: Volcaniclastic Rock |
|                   |                    |                           |

| No. | Particle Size   |              | Thin Section Determination |                |                           | Correction |                |                              | Matrix Correction |                           |
|-----|-----------------|--------------|----------------------------|----------------|---------------------------|------------|----------------|------------------------------|-------------------|---------------------------|
|     | D Value<br>(mm) | $\Phi$ Value | Number                     | Frequency<br>% | Cumulative<br>Frequency % | Number     | Frequency<br>% | Cumulative<br>Frequency<br>% | Frequency<br>%    | Cumulative<br>Frequency % |
| 1   | $\geq 2.0000$   | $\leq -1.00$ | 0                          | 0.00           | 0.00                      | 0          | 0.00           | 0.00                         | 0.00              | 0.00                      |
| 2   | $\sim 1.6818$   | $\sim -0.75$ | 0                          | 0.00           | 0.00                      | 0          | 0.00           | 0.00                         | 0.00              | 0.00                      |
| 3   | $\sim 1.4142$   | $\sim -0.50$ | 0                          | 0.00           | 0.00                      | 0          | 0.00           | 0.00                         | 0.00              | 0.00                      |
| 4   | $\sim 1.1892$   | $\sim -0.25$ | 0                          | 0.00           | 0.00                      | 0          | 0.00           | 0.00                         | 0.00              | 0.00                      |
| 5   | $\sim 1.0000$   | $\sim -0.00$ | 0                          | 0.00           | 0.00                      | 0          | 0.00           | 0.00                         | 0.00              | 0.00                      |
| 6   | $\sim 0.8409$   | $\sim 0.25$  | 0                          | 0.00           | 0.00                      | 0          | 0.00           | 0.00                         | 0.00              | 0.00                      |
| 7   | $\sim 0.7071$   | $\sim 0.50$  | 0                          | 0.00           | 0.00                      | 0          | 0.00           | 0.00                         | 0.00              | 0.00                      |
| 8   | $\sim 0.5946$   | $\sim 0.75$  | 0                          | 0.00           | 0.00                      | 0          | 0.00           | 0.00                         | 0.00              | 0.00                      |
| 9   | $\sim 0.5000$   | $\sim 1.00$  | 3                          | 7.96           | 7.96                      | 0          | 0.00           | 0.00                         | 0.00              | 0.00                      |
| 10  | $\sim 0.4204$   | $\sim 1.25$  | 2                          | 3.92           | 11.87                     | 3          | 7.96           | 7.96                         | 7.96              | 7.96                      |
| 11  | $\sim 0.3536$   | $\sim 1.50$  | 5                          | 6.87           | 18.74                     | 2          | 3.92           | 11.87                        | 3.92              | 11.87                     |
| 12  | $\sim 0.2973$   | $\sim 1.75$  | 12                         | 11.28          | 30.02                     | 5          | 6.87           | 18.74                        | 6.87              | 18.74                     |
| 13  | $\sim 0.2500$   | $\sim 2.00$  | 11                         | 7.33           | 37.35                     | 14         | 12.77          | 31.52                        | 12.77             | 31.52                     |
| 14  | $\sim 0.2102$   | $\sim 2.25$  | 10                         | 5.02           | 42.37                     | 15         | 8.95           | 40.46                        | 8.95              | 40.46                     |
| 15  | $\sim 0.1768$   | $\sim 2.50$  | 19                         | 6.35           | 48.72                     | 11         | 4.51           | 44.97                        | 4.51              | 44.97                     |
| 16  | $\sim 0.1487$   | $\sim 2.75$  | 25                         | 5.86           | 54.58                     | 25         | 7.04           | 52.02                        | 7.04              | 52.02                     |
| 17  | $\sim 0.1250$   | $\sim 3.00$  | 50                         | 8.10           | 62.68                     | 38         | 7.14           | 59.16                        | 7.14              | 59.16                     |
| 18  | $\sim 0.1051$   | $\sim 3.25$  | 54                         | 6.20           | 68.88                     | 58         | 7.67           | 66.83                        | 7.67              | 66.83                     |
| 19  | $\sim 0.0884$   | $\sim 3.50$  | 78                         | 6.41           | 75.29                     | 88         | 7.74           | 74.57                        | 7.74              | 74.57                     |
| 20  | $\sim 0.0743$   | $\sim 3.75$  | 113                        | 6.48           | 81.77                     | 110        | 6.55           | 81.13                        | 6.55              | 81.13                     |
| 21  | $\sim 0.0625$   | $\sim 4.00$  | 128                        | 5.24           | 87.01                     | 150        | 6.19           | 87.31                        | 6.19              | 87.31                     |
| 22  | $\sim 0.0526$   | $\sim 4.25$  | 183                        | 5.34           | 92.35                     | 205        | 5.77           | 93.08                        | 5.77              | 93.08                     |
| 23  | $\sim 0.0442$   | $\sim 4.50$  | 163                        | 3.38           | 95.72                     | 165        | 3.18           | 96.27                        | 3.18              | 96.27                     |
| 24  | $\sim 0.0372$   | $\sim 4.75$  | 170                        | 2.44           | 98.16                     | 198        | 2.59           | 98.86                        | 2.59              | 98.86                     |
| 25  | $\sim 0.0313$   | $\sim 5.00$  | 179                        | 1.84           | 100.00                    | 118        | 1.14           | 100.00                       | 1.14              | 100.00                    |
| 26  | $\sim 0.0156$   | $\sim 6.00$  | 0                          | 0.00           | 100.00                    | 0          | 0.00           | 100.00                       | 0.00              | 100.00                    |
| 27  | $\sim 0.0078$   | $\sim 7.00$  | 0                          | 0.00           | 100.00                    | 0          | 0.00           | 100.00                       | 0.00              | 100.00                    |
| 28  | $\sim 0.0039$   | $\sim 8.00$  | 0                          | 0.00           | 100.00                    | 0          | 0.00           | 100.00                       | 0.00              | 100.00                    |
| 29  | $< 0.0039$      | $> 8.00$     | Matrix Content             |                |                           | 0.00       |                |                              | 0.00              | 100.00                    |

|                        |                 |      |                                   |      |                  |            |                 |            |             |      |
|------------------------|-----------------|------|-----------------------------------|------|------------------|------------|-----------------|------------|-------------|------|
| $\Phi$ Value           | 1%              | 5%   | 10%                               | 16%  | 25%              | 50%        | 75%             | 84%        | 90%         | 95%  |
|                        | 1.03            | 1.16 | 1.38                              | 1.65 | 1.87             | 2.68       | 3.52            | 3.87       | 4.12        | 4.40 |
| Type<br>and<br>Content | $\Phi<-1$       |      | $-1<\Phi<0$                       |      |                  | $0<\Phi<1$ |                 | $1<\Phi<2$ |             |      |
|                        | 0.00%           |      | 0.00%                             |      |                  | 0.00%      |                 | 31.52%     |             |      |
|                        | $2<\Phi<3$      |      | $3<\Phi<4$                        |      | $4<\Phi<5$       |            | $5<\Phi<8$      |            | $\Phi\geq8$ |      |
|                        | 27.65%          |      | 28.15%                            |      | 12.69%           |            | 0.00%           |            | 0.00%       |      |
| Moment<br>Method       | Mean<br>$M_z$   | 2.71 | Standard<br>Deviation<br>$\sigma$ | 1.01 | Skewness<br>$SK$ | 0.17       | Kurtosis<br>$K$ | 1.98       |             |      |
| Graphic<br>Method      |                 | 2.73 |                                   | 1.05 |                  | 0.07       |                 | 0.81       |             |      |
|                        | C Value: 0.4892 |      |                                   |      | M Value: 0.1562  |            |                 |            |             |      |

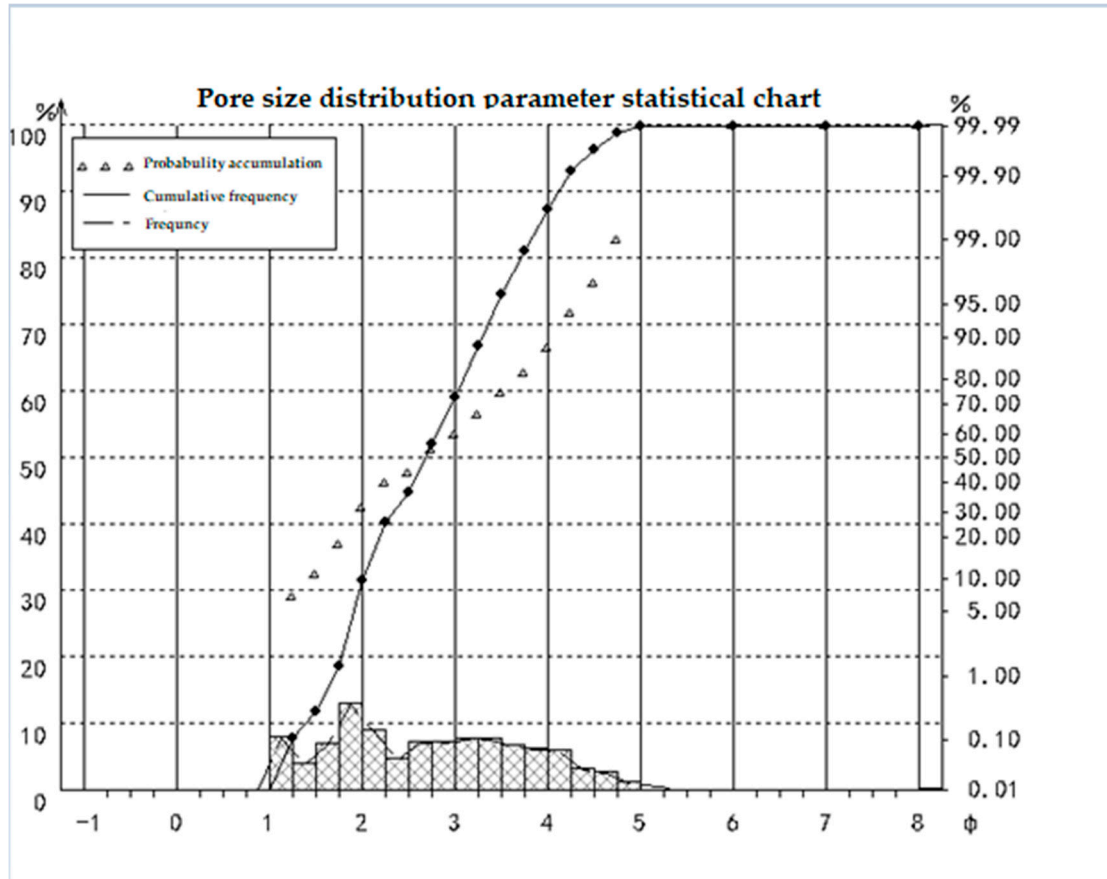

# CISA-Particle Size Analysis Datas Reports

Test Date: 2022-10-19

|                   |                    |                           |
|-------------------|--------------------|---------------------------|
| Sample: 4-10MPa-3 | Size, mm: 0.25-0.5 | Number of particles: 857  |
|                   | Depth,m:           | Name: Volcaniclastic Rock |
|                   |                    |                           |

| No. | Particle Size   |              | Thin Section Determination |                |                           | Correction |                |                              | Matrix Correction |                              |
|-----|-----------------|--------------|----------------------------|----------------|---------------------------|------------|----------------|------------------------------|-------------------|------------------------------|
|     | D Value<br>(mm) | $\Phi$ Value | Number                     | Frequency<br>% | Cumulative<br>Frequency % | Number     | Frequency<br>% | Cumulative<br>Frequency<br>% | Frequency<br>%    | Cumulative<br>Frequency<br>% |
| 1   | $\geq 2.0000$   | $\leq -1.00$ | 0                          | 0.00           | 0.00                      | 0          | 0.00           | 0.00                         | 0.00              | 0.00                         |
| 2   | $\sim 1.6818$   | $\sim -0.75$ | 0                          | 0.00           | 0.00                      | 0          | 0.00           | 0.00                         | 0.00              | 0.00                         |
| 3   | $\sim 1.4142$   | $\sim -0.50$ | 0                          | 0.00           | 0.00                      | 0          | 0.00           | 0.00                         | 0.00              | 0.00                         |
| 4   | $\sim 1.1892$   | $\sim -0.25$ | 0                          | 0.00           | 0.00                      | 0          | 0.00           | 0.00                         | 0.00              | 0.00                         |
| 5   | $\sim 1.0000$   | $\sim -0.00$ | 0                          | 0.00           | 0.00                      | 0          | 0.00           | 0.00                         | 0.00              | 0.00                         |
| 6   | $\sim 0.8409$   | $\sim 0.25$  | 0                          | 0.00           | 0.00                      | 0          | 0.00           | 0.00                         | 0.00              | 0.00                         |
| 7   | $\sim 0.7071$   | $\sim 0.50$  | 2                          | 9.07           | 9.07                      | 0          | 0.00           | 0.00                         | 0.00              | 0.00                         |
| 8   | $\sim 0.5946$   | $\sim 0.75$  | 1                          | 3.58           | 12.65                     | 0          | 0.00           | 0.00                         | 0.00              | 0.00                         |
| 9   | $\sim 0.5000$   | $\sim 1.00$  | 2                          | 5.20           | 17.85                     | 3          | 12.65          | 12.65                        | 12.65             | 12.65                        |
| 10  | $\sim 0.4204$   | $\sim 1.25$  | 7                          | 12.25          | 30.10                     | 2          | 5.20           | 17.85                        | 5.20              | 17.85                        |
| 11  | $\sim 0.3536$   | $\sim 1.50$  | 17                         | 21.36          | 51.46                     | 6          | 10.80          | 28.65                        | 10.80             | 28.65                        |
| 12  | $\sim 0.2973$   | $\sim 1.75$  | 14                         | 12.11          | 63.57                     | 18         | 22.81          | 51.46                        | 22.81             | 51.46                        |
| 13  | $\sim 0.2500$   | $\sim 2.00$  | 12                         | 7.53           | 71.10                     | 16         | 13.54          | 65.00                        | 13.54             | 65.00                        |
| 14  | $\sim 0.2102$   | $\sim 2.25$  | 11                         | 4.79           | 75.89                     | 12         | 7.10           | 72.10                        | 7.10              | 72.10                        |
| 15  | $\sim 0.1768$   | $\sim 2.50$  | 27                         | 8.36           | 84.25                     | 20         | 7.50           | 79.60                        | 7.50              | 79.60                        |
| 16  | $\sim 0.1487$   | $\sim 2.75$  | 14                         | 2.90           | 87.15                     | 20         | 5.57           | 85.17                        | 5.57              | 85.17                        |
| 17  | $\sim 0.1250$   | $\sim 3.00$  | 20                         | 3.06           | 90.21                     | 23         | 4.10           | 89.27                        | 4.10              | 89.27                        |
| 18  | $\sim 0.1051$   | $\sim 3.25$  | 22                         | 2.29           | 92.50                     | 19         | 2.27           | 91.54                        | 2.27              | 91.54                        |
| 19  | $\sim 0.0884$   | $\sim 3.50$  | 30                         | 2.33           | 94.83                     | 37         | 3.09           | 94.63                        | 3.09              | 94.63                        |
| 20  | $\sim 0.0743$   | $\sim 3.75$  | 26                         | 1.42           | 96.24                     | 28         | 1.57           | 96.20                        | 1.57              | 96.20                        |
| 21  | $\sim 0.0625$   | $\sim 4.00$  | 30                         | 1.15           | 97.39                     | 32         | 1.22           | 97.42                        | 1.22              | 97.42                        |
| 22  | $\sim 0.0526$   | $\sim 4.25$  | 40                         | 1.11           | 98.50                     | 43         | 1.17           | 98.59                        | 1.17              | 98.59                        |
| 23  | $\sim 0.0442$   | $\sim 4.50$  | 39                         | 0.75           | 99.26                     | 45         | 0.82           | 99.41                        | 0.82              | 99.41                        |
| 24  | $\sim 0.0372$   | $\sim 4.75$  | 32                         | 0.44           | 99.70                     | 33         | 0.41           | 99.82                        | 0.41              | 99.82                        |
| 25  | $\sim 0.0313$   | $\sim 5.00$  | 31                         | 0.30           | 100.00                    | 20         | 0.18           | 100.00                       | 0.18              | 100.00                       |
| 26  | $\sim 0.0156$   | $\sim 6.00$  | 0                          | 0.00           | 100.00                    | 0          | 0.00           | 100.00                       | 0.00              | 100.00                       |
| 27  | $\sim 0.0078$   | $\sim 7.00$  | 0                          | 0.00           | 100.00                    | 0          | 0.00           | 100.00                       | 0.00              | 100.00                       |
| 28  | $\sim 0.0039$   | $\sim 8.00$  | 0                          | 0.00           | 100.00                    | 0          | 0.00           | 100.00                       | 0.00              | 100.00                       |
| 29  | $< 0.0039$      | $> 8.00$     | Matrix Content             |                |                           | 0.00       |                |                              | 0.00              | 100.00                       |

|                        |                 |      |                                   |      |                  |            |                 |            |             |      |
|------------------------|-----------------|------|-----------------------------------|------|------------------|------------|-----------------|------------|-------------|------|
| $\Phi$ Value           | 1%              | 5%   | 10%                               | 16%  | 25%              | 50%        | 75%             | 84%        | 90%         | 95%  |
|                        | 0.77            | 0.85 | 0.95                              | 1.16 | 1.42             | 1.73       | 2.35            | 2.70       | 3.08        | 3.56 |
| Type<br>and<br>Content | $\Phi<-1$       |      | $-1<\Phi<0$                       |      |                  | $0<\Phi<1$ |                 | $1<\Phi<2$ |             |      |
|                        | 0.00%           |      | 0.00%                             |      |                  | 12.65%     |                 | 52.34%     |             |      |
|                        | $2<\Phi<3$      |      | $3<\Phi<4$                        |      | $4<\Phi<5$       |            | $5<\Phi<8$      |            | $\Phi\geq8$ |      |
|                        | 24.27%          |      | 8.16%                             |      | 2.58%            |            | 0.00%           |            | 0.00%       |      |
|                        |                 |      |                                   |      |                  |            |                 |            |             |      |
| Moment<br>Method       | Mean<br>$M_z$   | 1.93 | Standard<br>Deviation<br>$\sigma$ | 0.81 | Skewness<br>$SK$ | 1.02       | Kurtosis<br>$K$ | 3.91       |             |      |
| Graphic<br>Method      |                 | 1.86 |                                   | 0.79 |                  | 0.30       |                 | 1.19       |             |      |
|                        | C Value: 0.5865 |      |                                   |      | M Value: 0.3006  |            |                 |            |             |      |

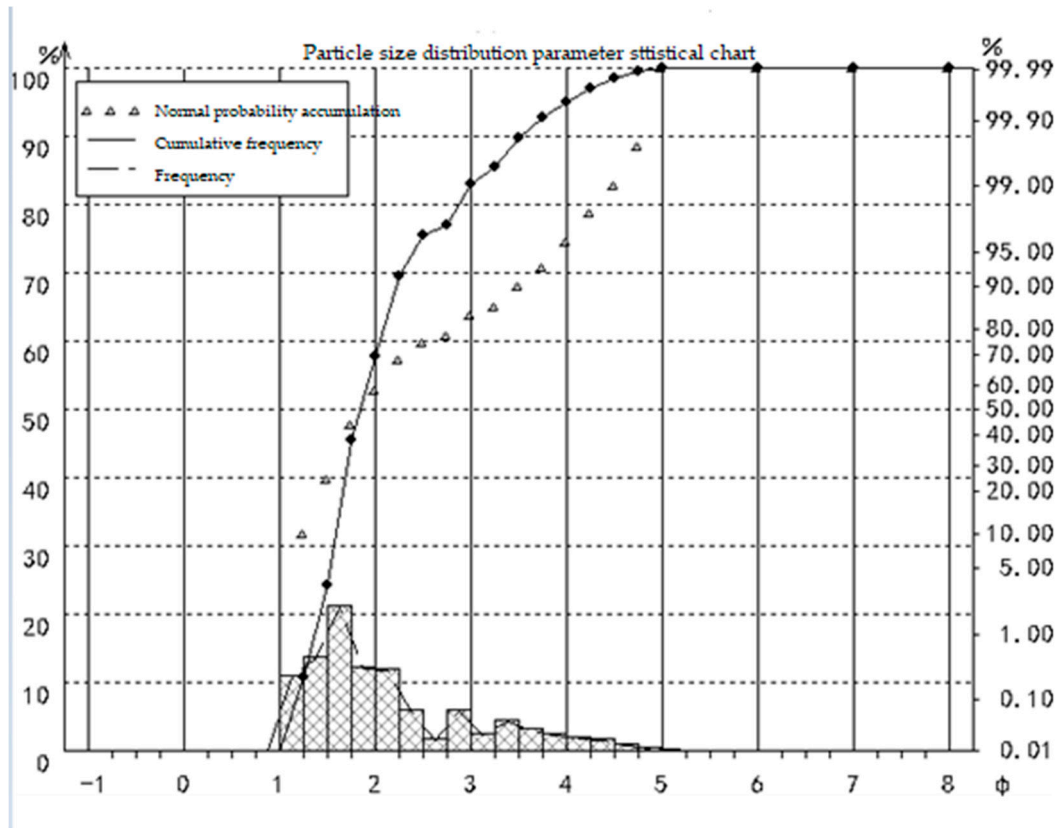

# CISA-Particle Size Analysis Datas Reports

Test Date: 2022-10-22

|                   |                    |                           |
|-------------------|--------------------|---------------------------|
| Sample: 4-10MPa-4 | Size, mm: 0.25-0.5 | Number of particles: 632  |
|                   | Depth,m:           | Name: Volcaniclastic Rock |
|                   |                    |                           |

| No. | Particle Size   |              | Thin Section Determination |                |                              | Correction |                |                              | Matrix Correction |                              |
|-----|-----------------|--------------|----------------------------|----------------|------------------------------|------------|----------------|------------------------------|-------------------|------------------------------|
|     | D Value<br>(mm) | $\Phi$ Value | Number                     | Frequency<br>% | Cumulative<br>Frequency<br>% | Number     | Frequency<br>% | Cumulative<br>Frequency<br>% | Frequency<br>%    | Cumulative<br>Frequency<br>% |
| 1   | $\geq 2.0000$   | $\leq -1.00$ | 0                          | 0.00           | 0.00                         | 0          | 0.00           | 0.00                         | 0.00              | 0.00                         |
| 2   | $\sim 1.6818$   | $\sim -0.75$ | 0                          | 0.00           | 0.00                         | 0          | 0.00           | 0.00                         | 0.00              | 0.00                         |
| 3   | $\sim 1.4142$   | $\sim -0.50$ | 0                          | 0.00           | 0.00                         | 0          | 0.00           | 0.00                         | 0.00              | 0.00                         |
| 4   | $\sim 1.1892$   | $\sim -0.25$ | 0                          | 0.00           | 0.00                         | 0          | 0.00           | 0.00                         | 0.00              | 0.00                         |
| 5   | $\sim 1.0000$   | $\sim -0.00$ | 0                          | 0.00           | 0.00                         | 0          | 0.00           | 0.00                         | 0.00              | 0.00                         |
| 6   | $\sim 0.8409$   | $\sim 0.25$  | 0                          | 0.00           | 0.00                         | 0          | 0.00           | 0.00                         | 0.00              | 0.00                         |
| 7   | $\sim 0.7071$   | $\sim 0.50$  | 0                          | 0.00           | 0.00                         | 0          | 0.00           | 0.00                         | 0.00              | 0.00                         |
| 8   | $\sim 0.5946$   | $\sim 0.75$  | 3                          | 12.93          | 12.93                        | 0          | 0.00           | 0.00                         | 0.00              | 0.00                         |
| 9   | $\sim 0.5000$   | $\sim 1.00$  | 4                          | 11.81          | 24.74                        | 2          | 9.10           | 9.10                         | 9.10              | 9.10                         |
| 10  | $\sim 0.4204$   | $\sim 1.25$  | 9                          | 18.58          | 43.32                        | 5          | 15.64          | 24.74                        | 15.64             | 24.74                        |
| 11  | $\sim 0.3536$   | $\sim 1.50$  | 10                         | 14.37          | 57.69                        | 8          | 16.80          | 41.54                        | 16.80             | 41.54                        |
| 12  | $\sim 0.2973$   | $\sim 1.75$  | 14                         | 14.53          | 72.22                        | 11         | 16.14          | 57.69                        | 16.14             | 57.69                        |
| 13  | $\sim 0.2500$   | $\sim 2.00$  | 10                         | 7.53           | 79.75                        | 15         | 15.37          | 73.06                        | 15.37             | 73.06                        |
| 14  | $\sim 0.2102$   | $\sim 2.25$  | 9                          | 4.91           | 84.65                        | 13         | 9.06           | 82.11                        | 9.06              | 82.11                        |
| 15  | $\sim 0.1768$   | $\sim 2.50$  | 9                          | 3.27           | 87.92                        | 8          | 3.71           | 85.83                        | 3.71              | 85.83                        |
| 16  | $\sim 0.1487$   | $\sim 2.75$  | 14                         | 3.38           | 91.30                        | 10         | 3.18           | 89.01                        | 3.18              | 89.01                        |
| 17  | $\sim 0.1250$   | $\sim 3.00$  | 13                         | 2.38           | 93.68                        | 16         | 3.52           | 92.52                        | 3.52              | 92.52                        |
| 18  | $\sim 0.1051$   | $\sim 3.25$  | 13                         | 1.66           | 95.35                        | 14         | 2.12           | 94.64                        | 2.12              | 94.64                        |
| 19  | $\sim 0.0884$   | $\sim 3.50$  | 14                         | 1.35           | 96.70                        | 18         | 1.90           | 96.54                        | 1.90              | 96.54                        |
| 20  | $\sim 0.0743$   | $\sim 3.75$  | 10                         | 0.66           | 97.36                        | 12         | 0.82           | 97.36                        | 0.82              | 97.36                        |
| 21  | $\sim 0.0625$   | $\sim 4.00$  | 18                         | 0.81           | 98.17                        | 18         | 0.81           | 98.17                        | 0.81              | 98.17                        |
| 22  | $\sim 0.0526$   | $\sim 4.25$  | 24                         | 0.78           | 98.95                        | 25         | 0.81           | 98.98                        | 0.81              | 98.98                        |
| 23  | $\sim 0.0442$   | $\sim 4.50$  | 21                         | 0.48           | 99.43                        | 24         | 0.53           | 99.50                        | 0.53              | 99.50                        |
| 24  | $\sim 0.0372$   | $\sim 4.75$  | 18                         | 0.29           | 99.73                        | 25         | 0.36           | 99.86                        | 0.36              | 99.86                        |
| 25  | $\sim 0.0313$   | $\sim 5.00$  | 23                         | 0.27           | 100.00                       | 12         | 0.14           | 100.00                       | 0.14              | 100.00                       |
| 26  | $\sim 0.0156$   | $\sim 6.00$  | 0                          | 0.00           | 100.00                       | 0          | 0.00           | 100.00                       | 0.00              | 100.00                       |
| 27  | $\sim 0.0078$   | $\sim 7.00$  | 0                          | 0.00           | 100.00                       | 0          | 0.00           | 100.00                       | 0.00              | 100.00                       |
| 28  | $\sim 0.0039$   | $\sim 8.00$  | 0                          | 0.00           | 100.00                       | 0          | 0.00           | 100.00                       | 0.00              | 100.00                       |
| 29  | $< 0.0039$      | $> 8.00$     | Matrix Content             |                |                              | 0.00       |                |                              | 0.00              | 100.00                       |

|                        |                   |      |             |                                   |                   |                  |            |                 |             |      |
|------------------------|-------------------|------|-------------|-----------------------------------|-------------------|------------------|------------|-----------------|-------------|------|
| $\Phi$ Value           | 1%                | 5%   | 10%         | 16%                               | 25%               | 50%              | 75%        | 84%             | 90%         | 95%  |
|                        | 0.78              | 0.89 | 1.01        | 1.11                              | 1.25              | 1.63             | 2.05       | 2.38            | 2.82        | 3.30 |
| Type<br>and<br>Content | $\Phi<-1$         |      | $-1<\Phi<0$ |                                   |                   | $0<\Phi<1$       |            | $1<\Phi<2$      |             |      |
|                        | 0.00%             |      | 0.00%       |                                   |                   | 9.10%            |            | 63.96%          |             |      |
|                        | $2<\Phi<3$        |      | $3<\Phi<4$  |                                   | $4<\Phi<5$        |                  | $5<\Phi<8$ |                 | $\Phi\geq8$ |      |
|                        | 19.47%            |      | 5.65%       |                                   | 1.83%             |                  | 0.00%      |                 | 0.00%       |      |
| Moment<br>Method       | Mean<br>$M_z$     | 1.77 |             | Standard<br>Deviation<br>$\sigma$ | 0.73              | Skewness<br>$SK$ | 1.38       | Kurtosis<br>$K$ | 5.12        |      |
| Graphic<br>Method      |                   | 1.71 |             |                                   | 0.68              |                  | 0.28       |                 | 1.23        |      |
|                        | $C$ Value: 0.5834 |      |             |                                   | $M$ Value: 0.3229 |                  |            |                 |             |      |

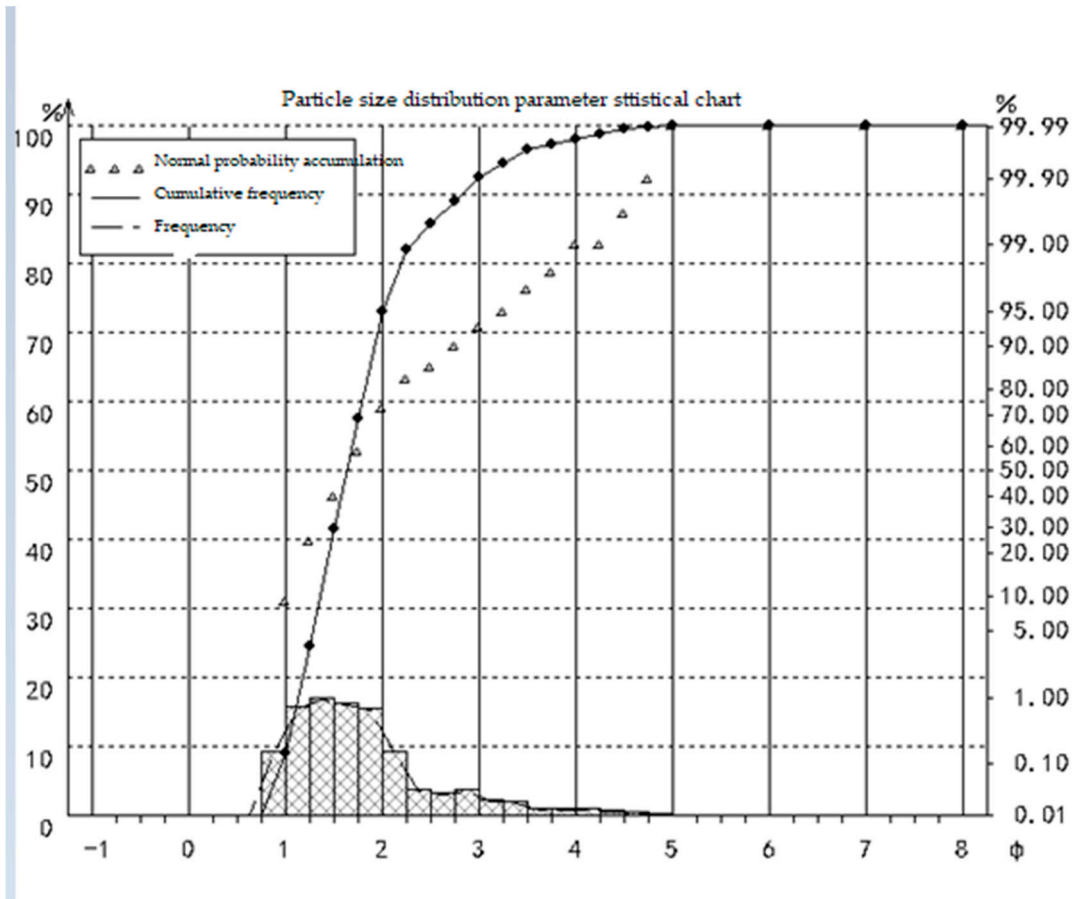



# CISA-Particle Size Analysis Datas Reports

Test Date: 2022-11-03

|                 |                    |                           |
|-----------------|--------------------|---------------------------|
| Sample: 4-30MPa | Size, mm: 0.25-0.5 | Number of particles: 2355 |
|                 | Depth,m:           | Name: Volcaniclastic Rock |
|                 |                    |                           |

| No. | Particle Size   |              | Thin Section Determination |                |                              | Correction |                |                              | Matrix Correction |                              |
|-----|-----------------|--------------|----------------------------|----------------|------------------------------|------------|----------------|------------------------------|-------------------|------------------------------|
|     | D Value<br>(mm) | $\Phi$ Value | Number                     | Frequency<br>% | Cumulative<br>Frequency<br>% | Number     | Frequency<br>% | Cumulative<br>Frequency<br>% | Frequency<br>%    | Cumulative<br>Frequency<br>% |
| 1   | $\geq 2.0000$   | $\leq -1.00$ | 0                          | 0.00           | 0.00                         | 0          | 0.00           | 0.00                         | 0.00              | 0.00                         |
| 2   | $\sim 1.6818$   | $\sim -0.75$ | 0                          | 0.00           | 0.00                         | 0          | 0.00           | 0.00                         | 0.00              | 0.00                         |
| 3   | $\sim 1.4142$   | $\sim -0.50$ | 0                          | 0.00           | 0.00                         | 0          | 0.00           | 0.00                         | 0.00              | 0.00                         |
| 4   | $\sim 1.1892$   | $\sim -0.25$ | 0                          | 0.00           | 0.00                         | 0          | 0.00           | 0.00                         | 0.00              | 0.00                         |
| 5   | $\sim 1.0000$   | $\sim -0.00$ | 0                          | 0.00           | 0.00                         | 0          | 0.00           | 0.00                         | 0.00              | 0.00                         |
| 6   | $\sim 0.8409$   | $\sim 0.25$  | 0                          | 0.00           | 0.00                         | 0          | 0.00           | 0.00                         | 0.00              | 0.00                         |
| 7   | $\sim 0.7071$   | $\sim 0.50$  | 0                          | 0.00           | 0.00                         | 0          | 0.00           | 0.00                         | 0.00              | 0.00                         |
| 8   | $\sim 0.5946$   | $\sim 0.75$  | 8                          | 1.46           | 1.00                         | 1          | 3.72           | 3.72                         | 3.72              | 3.72                         |
| 9   | $\sim 0.5000$   | $\sim 1.00$  | 13                         | 2.37           | 3.37                         | 6          | 18.85          | 22.57                        | 18.85             | 22.57                        |
| 10  | $\sim 0.4204$   | $\sim 1.25$  | 10                         | 1.82           | 5.20                         | 9          | 18.46          | 41.03                        | 18.46             | 41.03                        |
| 11  | $\sim 0.3536$   | $\sim 1.50$  | 9                          | 1.64           | 6.84                         | 8          | 11.25          | 52.28                        | 11.25             | 52.28                        |
| 12  | $\sim 0.2973$   | $\sim 1.75$  | 20                         | 3.65           | 10.49                        | 15         | 14.42          | 66.69                        | 14.42             | 66.69                        |
| 13  | $\sim 0.2500$   | $\sim 2.00$  | 10                         | 1.82           | 12.31                        | 11         | 7.34           | 74.04                        | 7.34              | 74.04                        |
| 14  | $\sim 0.2102$   | $\sim 2.25$  | 16                         | 2.92           | 15.23                        | 11         | 4.70           | 78.73                        | 4.70              | 78.73                        |
| 15  | $\sim 0.1768$   | $\sim 2.50$  | 19                         | 3.47           | 18.70                        | 18         | 5.89           | 84.62                        | 5.89              | 84.62                        |
| 16  | $\sim 0.1487$   | $\sim 2.75$  | 18                         | 3.28           | 21.99                        | 12         | 2.54           | 87.16                        | 2.54              | 87.16                        |
| 17  | $\sim 0.1250$   | $\sim 3.00$  | 28                         | 5.11           | 27.09                        | 25         | 3.51           | 90.67                        | 3.51              | 90.67                        |
| 18  | $\sim 0.1051$   | $\sim 3.25$  | 37                         | 6.75           | 33.85                        | 17         | 1.61           | 92.28                        | 1.61              | 92.28                        |
| 19  | $\sim 0.0884$   | $\sim 3.50$  | 36                         | 6.57           | 40.42                        | 28         | 1.82           | 94.10                        | 1.82              | 94.10                        |
| 20  | $\sim 0.0743$   | $\sim 3.75$  | 44                         | 8.03           | 48.45                        | 31         | 1.37           | 95.47                        | 1.37              | 95.47                        |
| 21  | $\sim 0.0625$   | $\sim 4.00$  | 43                         | 7.85           | 56.29                        | 45         | 1.41           | 96.87                        | 1.41              | 96.87                        |
| 22  | $\sim 0.0526$   | $\sim 4.25$  | 55                         | 10.04          | 66.33                        | 49         | 1.00           | 97.88                        | 1.00              | 97.88                        |
| 23  | $\sim 0.0442$   | $\sim 4.50$  | 67                         | 12.23          | 78.55                        | 45         | 0.64           | 98.51                        | 0.64              | 98.51                        |
| 24  | $\sim 0.0372$   | $\sim 4.75$  | 54                         | 9.85           | 88.41                        | 63         | 0.61           | 99.13                        | 0.61              | 99.13                        |
| 25  | $\sim 0.0313$   | $\sim 5.00$  | 61                         | 11.13          | 99.54                        | 71         | 0.47           | 99.59                        | 0.47              | 99.59                        |
| 26  | $\sim 0.0156$   | $\sim 6.00$  | 0                          | 0.00           | 100                          | 0          | 0.21           | 100.00                       | 0.23              | 100.00                       |
| 27  | $\sim 0.0078$   | $\sim 7.00$  | 0                          | 0.00           | 100.00                       | 0          | 0.19           | 100.00                       | 0.21              | 100.00                       |
| 28  | $\sim 0.0039$   | $\sim 8.00$  | 0                          | 0.00           | 100.00                       | 0          | 0.20           | 100.00                       | 0.17              | 100.00                       |
| 29  | $< 0.0039$      | $> 8.00$     | Matrix Content             |                |                              | 0.00       |                |                              | 0.00              | 100.00                       |

|                        |                   |      |                                   |      |                   |            |                 |            |             |      |
|------------------------|-------------------|------|-----------------------------------|------|-------------------|------------|-----------------|------------|-------------|------|
| $\Phi$ Value           | 1%                | 5%   | 10%                               | 16%  | 25%               | 50%        | 75%             | 84%        | 90%         | 95%  |
|                        | 0.67              | 0.86 | 0.94                              | 1.02 | 1.13              | 1.58       | 1.83            | 2.5        | 3.15        | 3.71 |
| Type<br>and<br>Content | $\Phi<-1$         |      | $-1<\Phi<0$                       |      |                   | $0<\Phi<1$ |                 | $1<\Phi<2$ |             |      |
|                        | 0.00%             |      | 0.00%                             |      |                   | 3.8%       |                 | 59.09%     |             |      |
|                        | $2<\Phi<3$        |      | $3<\Phi<4$                        |      | $4<\Phi<5$        |            | $5<\Phi<8$      |            | $\Phi\geq8$ |      |
|                        | 20.53%            |      | 8.43%                             |      | 8.15%             |            | 0.00%           |            | 0.00%       |      |
| Moment<br>Method       | Mean<br>$M_z$     | 1.19 | Standard<br>Deviation<br>$\sigma$ | 0.90 | Skewness<br>$SK$  | 1.46       | Kurtosis<br>$K$ | 4.97       |             |      |
| Graphic<br>Method      |                   | 1.11 |                                   | 0.83 |                   | 0.42       |                 | 1.17       |             |      |
|                        | $C$ Value: 0.9545 |      |                                   |      | $M$ Value: 0.5178 |            |                 |            |             |      |

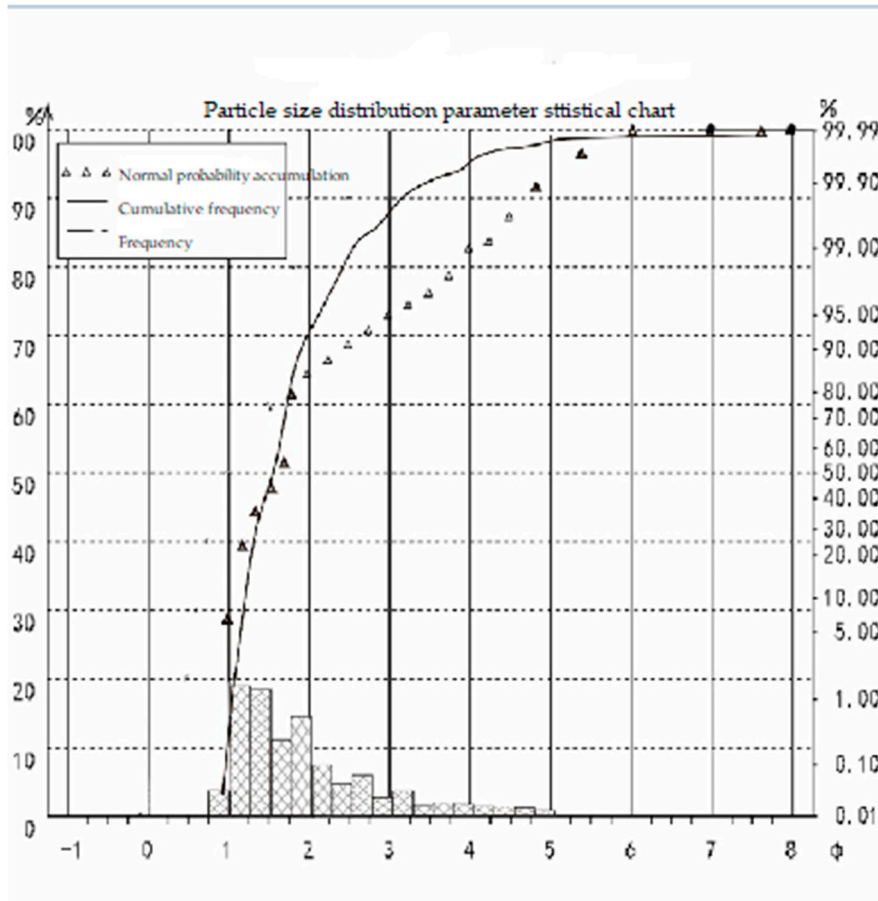

# CISA-Particle Size Analysis Datas Reports

Test Date: 2022-11-05

|                 |                    |                           |
|-----------------|--------------------|---------------------------|
| Sample: 4-50MPa | Size, mm: 0.25-0.5 | Number of particles: 1550 |
|                 | Depth,m:           | Name: Volcaniclastic Rock |
|                 |                    |                           |

| No. | Particle Size   |              | Thin Section Determination |                |                              | Correction |                |                              | Matrix Correction |                           |
|-----|-----------------|--------------|----------------------------|----------------|------------------------------|------------|----------------|------------------------------|-------------------|---------------------------|
|     | D Value<br>(mm) | $\Phi$ Value | Number                     | Frequency<br>% | Cumulative<br>Frequency<br>% | Number     | Frequency<br>% | Cumulative<br>Frequency<br>% | Frequency<br>%    | Cumulative<br>Frequency % |
| 1   | $\geq 2.0000$   | $\leq -1.00$ | 0                          | 0.00           | 0.00                         | 0          | 0.00           | 0.00                         | 0.00              | 0.00                      |
| 2   | $\sim 1.6818$   | $\sim -0.75$ | 0                          | 0.00           | 0.00                         | 0          | 0.00           | 0.00                         | 0.00              | 0.00                      |
| 3   | $\sim 1.4142$   | $\sim -0.50$ | 0                          | 0.00           | 0.00                         | 0          | 0.00           | 0.00                         | 0.00              | 0.00                      |
| 4   | $\sim 1.1892$   | $\sim -0.25$ | 0                          | 0.00           | 0.00                         | 0          | 0.00           | 0.00                         | 0.00              | 0.00                      |
| 5   | $\sim 1.0000$   | $\sim -0.00$ | 0                          | 0.00           | 0.00                         | 0          | 0.00           | 0.00                         | 0.00              | 0.00                      |
| 6   | $\sim 0.8409$   | $\sim 0.25$  | 0                          | 0.00           | 0.00                         | 0          | 0.00           | 0.00                         | 0.00              | 0.00                      |
| 7   | $\sim 0.7071$   | $\sim 0.50$  | 0                          | 0.00           | 0.00                         | 0          | 0.00           | 0.00                         | 0.00              | 0.00                      |
| 8   | $\sim 0.5946$   | $\sim 0.75$  | 1                          | 2.89           | 2.89                         | 0          | 0.00           | 0.00                         | 0.00              | 0.00                      |
| 9   | $\sim 0.5000$   | $\sim 1.00$  | 3                          | 6.40           | 9.29                         | 0          | 0.00           | 0.00                         | 0.00              | 0.00                      |
| 10  | $\sim 0.4204$   | $\sim 1.25$  | 4                          | 6.94           | 16.23                        | 3          | 7.33           | 7.33                         | 7.33              | 7.33                      |
| 11  | $\sim 0.3536$   | $\sim 1.50$  | 9                          | 10.23          | 26.46                        | 5          | 8.90           | 16.23                        | 8.90              | 16.23                     |
| 12  | $\sim 0.2973$   | $\sim 1.75$  | 19                         | 15.48          | 41.94                        | 10         | 11.20          | 27.43                        | 11.20             | 27.43                     |
| 13  | $\sim 0.2500$   | $\sim 2.00$  | 17                         | 9.84           | 51.78                        | 21         | 16.53          | 43.96                        | 16.53             | 43.96                     |
| 14  | $\sim 0.2102$   | $\sim 2.25$  | 16                         | 6.79           | 58.57                        | 19         | 10.16          | 54.13                        | 10.16             | 54.13                     |
| 15  | $\sim 0.1768$   | $\sim 2.50$  | 21                         | 6.09           | 64.66                        | 18         | 6.76           | 60.88                        | 6.76              | 60.88                     |
| 16  | $\sim 0.1487$   | $\sim 2.75$  | 35                         | 7.22           | 71.88                        | 33         | 8.00           | 68.89                        | 8.00              | 68.89                     |
| 17  | $\sim 0.1250$   | $\sim 3.00$  | 29                         | 4.13           | 76.01                        | 30         | 5.13           | 74.02                        | 5.13              | 74.02                     |
| 18  | $\sim 0.1051$   | $\sim 3.25$  | 44                         | 4.40           | 80.41                        | 40         | 4.66           | 78.68                        | 4.66              | 78.68                     |
| 19  | $\sim 0.0884$   | $\sim 3.50$  | 72                         | 5.30           | 85.71                        | 80         | 6.33           | 85.01                        | 6.33              | 85.01                     |
| 20  | $\sim 0.0743$   | $\sim 3.75$  | 80                         | 4.15           | 89.85                        | 86         | 4.63           | 89.63                        | 4.63              | 89.63                     |
| 21  | $\sim 0.0625$   | $\sim 4.00$  | 92                         | 3.37           | 93.22                        | 103        | 3.77           | 93.40                        | 3.77              | 93.40                     |
| 22  | $\sim 0.0526$   | $\sim 4.25$  | 103                        | 2.65           | 95.88                        | 109        | 2.73           | 96.13                        | 2.73              | 96.13                     |
| 23  | $\sim 0.0442$   | $\sim 4.50$  | 101                        | 1.84           | 97.72                        | 120        | 2.04           | 98.17                        | 2.04              | 98.17                     |
| 24  | $\sim 0.0372$   | $\sim 4.75$  | 100                        | 1.30           | 99.02                        | 113        | 1.30           | 99.46                        | 1.30              | 99.46                     |
| 25  | $\sim 0.0313$   | $\sim 5.00$  | 106                        | 0.98           | 100.00                       | 62         | 0.54           | 100.00                       | 0.54              | 100.00                    |
| 26  | $\sim 0.0156$   | $\sim 6.00$  | 0                          | 0.00           | 100.00                       | 0          | 0.00           | 100.00                       | 0.00              | 100.00                    |
| 27  | $\sim 0.0078$   | $\sim 7.00$  | 0                          | 0.00           | 100.00                       | 0          | 0.00           | 100.00                       | 0.00              | 100.00                    |
| 28  | $\sim 0.0039$   | $\sim 8.00$  | 0                          | 0.00           | 100.00                       | 0          | 0.00           | 100.00                       | 0.00              | 100.00                    |
| 29  | $< 0.0039$      | $> 8.00$     | Matrix Content             |                |                              | 0.00       |                |                              | 0.00              | 100.00                    |

|                        |                 |      |                                   |      |                  |                |                 |                |               |      |
|------------------------|-----------------|------|-----------------------------------|------|------------------|----------------|-----------------|----------------|---------------|------|
| $\Phi$ Value           | 1%              | 5%   | 10%                               | 16%  | 25%              | 50%            | 75%             | 84%            | 90%           | 95%  |
|                        | 1.03            | 1.17 | 1.33                              | 1.49 | 1.70             | 2.15           | 3.05            | 3.46           | 3.77          | 4.15 |
| Type<br>and<br>Content | $\Phi < -1$     |      | $-1 < \Phi < 0$                   |      |                  | $0 < \Phi < 1$ |                 | $1 < \Phi < 2$ |               |      |
|                        | 0.00%           |      | 0.00%                             |      |                  | 0.00%          |                 | 43.96%         |               |      |
|                        | $2 < \Phi < 3$  |      | $3 < \Phi < 4$                    |      | $4 < \Phi < 5$   |                | $5 < \Phi < 8$  |                | $\Phi \geq 8$ |      |
|                        | 30.06%          |      | 19.38%                            |      | 6.60%            |                | 0.00%           |                | 0.00%         |      |
| Moment<br>Method       | Mean<br>$M_z$   | 2.39 | Standard<br>Deviation<br>$\sigma$ | 0.92 | Skewness<br>$SK$ | 0.65           | Kurtosis<br>$K$ | 2.52           |               |      |
| Graphic<br>Method      |                 | 2.37 |                                   | 0.94 |                  | 0.34           |                 | 0.90           |               |      |
|                        | C Value: 0.4883 |      |                                   |      | M Value: 0.2255  |                |                 |                |               |      |

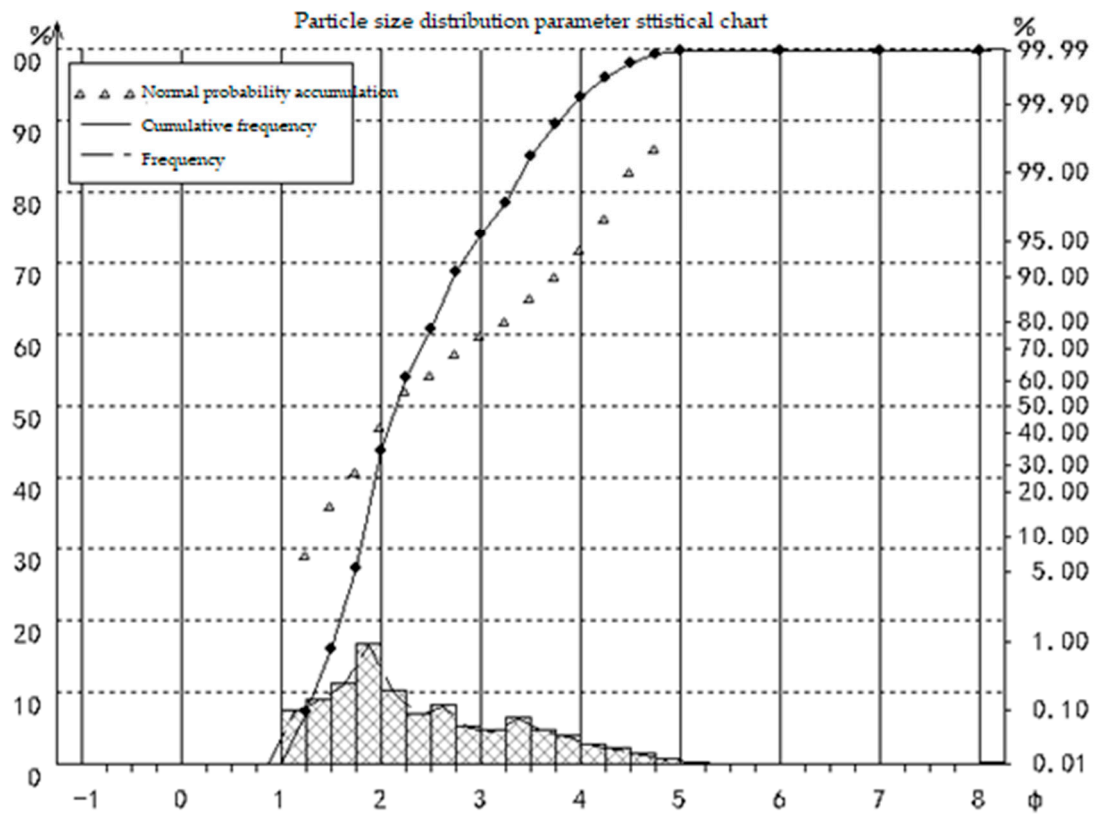

# CISA-Particle Size Analysis Datas Reports

Test Date: 2022-11-07

|                 |                    |                           |
|-----------------|--------------------|---------------------------|
| Sample: 4-70MPa | Size, mm: 0.25-0.5 | Number of particles: 2409 |
|                 | Depth,m:           | Name: Volcaniclastic Rock |
|                 |                    |                           |

| No. | Particle Size   |              | Thin Section Determination |                |                              | Correction |                |                              | Matrix Correction |                           |
|-----|-----------------|--------------|----------------------------|----------------|------------------------------|------------|----------------|------------------------------|-------------------|---------------------------|
|     | D Value<br>(mm) | $\Phi$ Value | Number                     | Frequency<br>% | Cumulative<br>Frequency<br>% | Number     | Frequency<br>% | Cumulative<br>Frequency<br>% | Frequency<br>%    | Cumulative<br>Frequency % |
| 1   | $\geq 2.0000$   | $\leq -1.00$ | 0                          | 0.00           | 0.00                         | 0          | 0.00           | 0.00                         | 0.00              | 0.00                      |
| 2   | $\sim 1.6818$   | $\sim -0.75$ | 0                          | 0.00           | 0.00                         | 0          | 0.00           | 0.00                         | 0.00              | 0.00                      |
| 3   | $\sim 1.4142$   | $\sim -0.50$ | 0                          | 0.00           | 0.00                         | 0          | 0.00           | 0.00                         | 0.00              | 0.00                      |
| 4   | $\sim 1.1892$   | $\sim -0.25$ | 0                          | 0.00           | 0.00                         | 0          | 0.00           | 0.00                         | 0.00              | 0.00                      |
| 5   | $\sim 1.0000$   | $\sim -0.00$ | 0                          | 0.00           | 0.00                         | 0          | 0.00           | 0.00                         | 0.00              | 0.00                      |
| 6   | $\sim 0.8409$   | $\sim 0.25$  | 1                          | 6.52           | 6.52                         | 0          | 0.00           | 0.00                         | 0.00              | 0.00                      |
| 7   | $\sim 0.7071$   | $\sim 0.50$  | 0                          | 0.00           | 6.52                         | 1          | 6.52           | 6.52                         | 6.52              | 6.52                      |
| 8   | $\sim 0.5946$   | $\sim 0.75$  | 0                          | 0.00           | 6.52                         | 0          | 0.00           | 6.52                         | 0.00              | 6.52                      |
| 9   | $\sim 0.5000$   | $\sim 1.00$  | 6                          | 14.02          | 20.55                        | 0          | 0.00           | 6.52                         | 0.00              | 6.52                      |
| 10  | $\sim 0.4204$   | $\sim 1.25$  | 5                          | 7.69           | 28.24                        | 5          | 12.08          | 18.60                        | 12.08             | 18.60                     |
| 11  | $\sim 0.3536$   | $\sim 1.50$  | 7                          | 7.69           | 35.93                        | 6          | 9.63           | 28.24                        | 9.63              | 28.24                     |
| 12  | $\sim 0.2973$   | $\sim 1.75$  | 8                          | 6.62           | 42.55                        | 7          | 7.69           | 35.93                        | 7.69              | 35.93                     |
| 13  | $\sim 0.2500$   | $\sim 2.00$  | 8                          | 4.54           | 47.08                        | 8          | 6.62           | 42.55                        | 6.62              | 42.55                     |
| 14  | $\sim 0.2102$   | $\sim 2.25$  | 22                         | 8.56           | 55.64                        | 12         | 6.38           | 48.93                        | 6.38              | 48.93                     |
| 15  | $\sim 0.1768$   | $\sim 2.50$  | 22                         | 6.14           | 61.79                        | 22         | 7.94           | 56.87                        | 7.94              | 56.87                     |
| 16  | $\sim 0.1487$   | $\sim 2.75$  | 32                         | 6.37           | 68.16                        | 35         | 8.57           | 65.44                        | 8.57              | 65.44                     |
| 17  | $\sim 0.1250$   | $\sim 3.00$  | 32                         | 4.45           | 72.61                        | 31         | 5.16           | 70.61                        | 5.16              | 70.61                     |
| 18  | $\sim 0.1051$   | $\sim 3.25$  | 48                         | 4.77           | 77.38                        | 47         | 5.29           | 75.89                        | 5.29              | 75.89                     |
| 19  | $\sim 0.0884$   | $\sim 3.50$  | 70                         | 4.97           | 82.35                        | 71         | 5.47           | 81.36                        | 5.47              | 81.36                     |
| 20  | $\sim 0.0743$   | $\sim 3.75$  | 82                         | 4.06           | 86.41                        | 94         | 4.88           | 86.24                        | 4.88              | 86.24                     |
| 21  | $\sim 0.0625$   | $\sim 4.00$  | 107                        | 3.80           | 90.22                        | 114        | 4.07           | 90.31                        | 4.07              | 90.31                     |
| 22  | $\sim 0.0526$   | $\sim 4.25$  | 141                        | 3.58           | 93.80                        | 163        | 4.01           | 94.31                        | 4.01              | 94.31                     |
| 23  | $\sim 0.0442$   | $\sim 4.50$  | 139                        | 2.49           | 96.29                        | 156        | 2.57           | 96.89                        | 2.57              | 96.89                     |
| 24  | $\sim 0.0372$   | $\sim 4.75$  | 173                        | 2.18           | 98.47                        | 203        | 2.30           | 99.19                        | 2.30              | 99.19                     |
| 25  | $\sim 0.0313$   | $\sim 5.00$  | 168                        | 1.53           | 100.00                       | 96         | 0.81           | 100.00                       | 0.81              | 100.00                    |
| 26  | $\sim 0.0156$   | $\sim 6.00$  | 0                          | 0.00           | 100.00                       | 0          | 0.00           | 100.00                       | 0.00              | 100.00                    |
| 27  | $\sim 0.0078$   | $\sim 7.00$  | 0                          | 0.00           | 100.00                       | 0          | 0.00           | 100.00                       | 0.00              | 100.00                    |
| 28  | $\sim 0.0039$   | $\sim 8.00$  | 0                          | 0.00           | 100.00                       | 0          | 0.00           | 100.00                       | 0.00              | 100.00                    |
| 29  | $< 0.0039$      | $> 8.00$     | Matrix Content             |                |                              | 0.00       |                |                              | 0.00              | 100.00                    |

|                        |                 |      |                                   |                 |                  |            |                 |            |             |      |
|------------------------|-----------------|------|-----------------------------------|-----------------|------------------|------------|-----------------|------------|-------------|------|
| $\Phi$ Value           | 1%              | 5%   | 10%                               | 16%             | 25%              | 50%        | 75%             | 84%        | 90%         | 95%  |
|                        | 0.29            | 0.44 | 1.07                              | 1.20            | 1.42             | 2.28       | 3.21            | 3.64       | 3.98        | 4.32 |
| Type<br>and<br>Content | $\Phi<-1$       |      | $-1<\Phi<0$                       |                 |                  | $0<\Phi<1$ |                 | $1<\Phi<2$ |             |      |
|                        | 0.00%           |      | 0.00%                             |                 |                  | 6.52%      |                 | 36.02%     |             |      |
|                        | $2<\Phi<3$      |      | $3<\Phi<4$                        |                 | $4<\Phi<5$       |            | $5<\Phi<8$      |            | $\Phi\geq8$ |      |
|                        | 28.06%          |      | 19.70%                            |                 | 9.69%            |            | 0.00%           |            | 0.00%       |      |
| Moment<br>Method       | Mean<br>$M_z$   | 2.35 | Standard<br>Deviation<br>$\sigma$ | 1.13            | Skewness<br>$SK$ | 0.23       | Kurtosis<br>$K$ | 2.22       |             |      |
| Graphic<br>Method      |                 | 2.37 |                                   | 1.20            |                  | 0.08       |                 | 0.89       |             |      |
|                        | C Value: 0.8189 |      |                                   | M Value: 0.2054 |                  |            |                 |            |             |      |

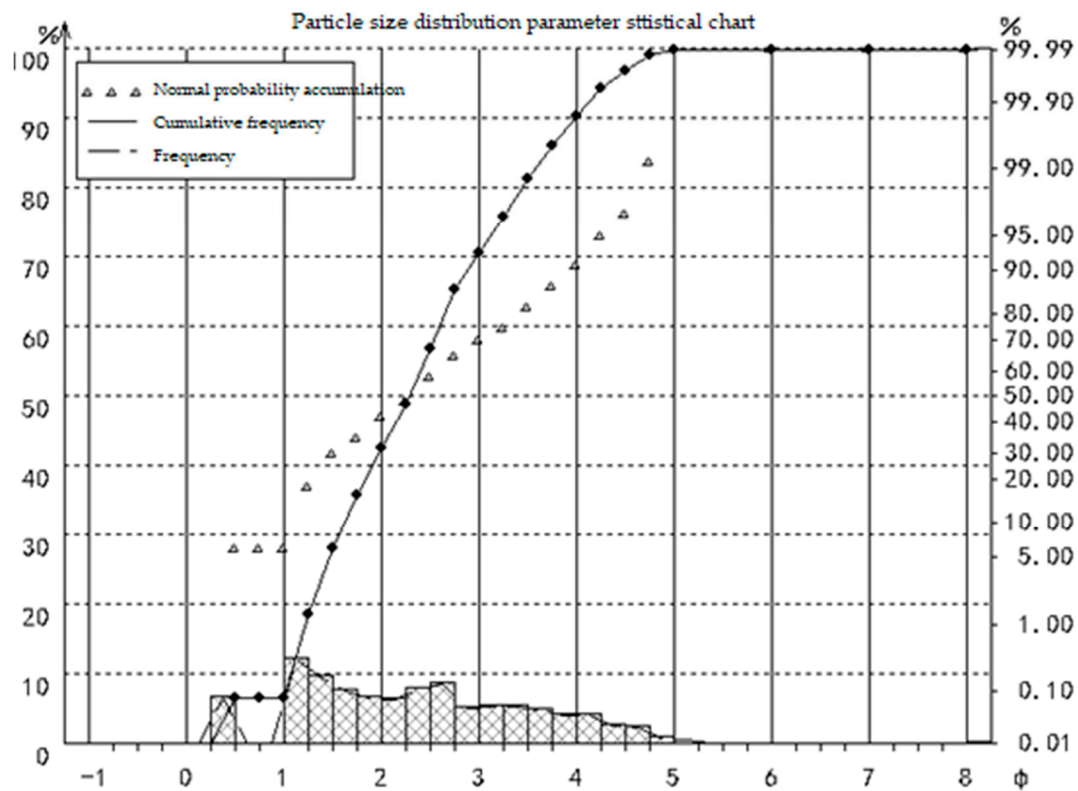

Supplement: s1 [file s1]
